# Supplementary material
Source: MDPI journal article supplement (https://www.mdpi.com/2673-933X/4/2/17)
Supplement: s1 [file s1]

Archive with 2 entries (2 files):
- Supplementary Table S1 The population of farm animals and their products.pdf
- Supplementary Table S2 Livestock census and production in the Jordanian governorates.pdf
