# Supplementary material
Source: MDPI journal article supplement (https://www.mdpi.com/2673-933X/4/2/17)
Supplement: s1 [file s1 › Supplementary Table S1 The population of farm animals and their products.pdf]

**Table (S1): The population of farm animals and their products.**

| <b>Animals</b> | <b>Number of<br/>Animals<br/>(Heads)</b> | <b>Meat<br/>Production<br/>(Tons)</b> | <b>Meat % of<br/>Animal<br/>Population</b> | <b>Dairy<br/>Production<br/>(Tons)</b> | <b>Dairy % of<br/>Animal<br/>Population</b> |
|----------------|------------------------------------------|---------------------------------------|--------------------------------------------|----------------------------------------|---------------------------------------------|
| <b>Sheep</b>   | 450,000                                  | 9,000                                 | 27.27%                                     | 4000                                   | 17.47                                       |
| <b>Goats</b>   | 380,000                                  | 7,600                                 | 22.98%                                     | 8000                                   | 34.93                                       |
| <b>Cattle</b>  | 550,000                                  | 13,750                                | 41.60%                                     | 9,900                                  | 43.23                                       |
| <b>Camels</b>  | 90,000                                   | 2,700                                 | 8.17%                                      | 1,000                                  | 4.37                                        |
| <b>Total</b>   | 1,470,000                                | 33,050                                | 100%                                       | 22,900                                 | 100%                                        |

Sheep and goats are key players in Jordan's agricultural sector, contributing significantly to meat and dairy production alongside cattle. This diversity strengthens the sustainability of the country's agriculture.
