# Supplementary material
Source: MDPI journal article supplement (https://www.mdpi.com/2673-933X/4/2/17)
Supplement: s1 [file s1 › Supplementary Table S2 Livestock census and production in the Jordanian governorates.pdf]

**Table (S2): Livestock census and production in the Jordanian governorates.**

| <b>Animals</b> | <b>Province</b> | <b>Number of heads</b> | <b>Percentage</b> | <b>Meat production (Tons)</b> | <b>Dairy production (Tons)</b> |
|----------------|-----------------|------------------------|-------------------|-------------------------------|--------------------------------|
| <b>Sheep</b>   | Irbid           | 265,100                | 6.30%             | 16,576.30                     | 825,500                        |
|                | Jerash          | 16,800                 | 0.40%             | 672                           | 84,000                         |
|                | Ajloun          | 16,800                 | 0.40%             | 672                           | 84,000                         |
|                | Mafraq          | 1,548,700              | 37.40%            | 582,342                       | 7,743,500                      |
|                | Amman           | 865,000                | 20.80%            | 179,040                       | 4,425,000                      |
|                | Ma'an           | 231,000                | 5.50%             | 12,655                        | 632,500                        |
|                | Zarqa           | 367,200                | 8.80%             | 32,505.60                     | 1,625,000                      |
|                | Balqa           | 183,600                | 4.40%             | 8,154.40                      | 409,000                        |
|                | Karak           | 316,800                | 7.60%             | 24,028.80                     | 1,204,000                      |
|                | Ma'an           | 220,500                | 5.30%             | 11,726.50                     | 586,250                        |
|                | Tafilah         | 108,000                | 2.60%             | 2,808                         | 140,400                        |
|                | Aqaba           | 21,000                 | 0.50%             | 105                           | 5,250                          |
|                | Total           | 4,200,500              | 100%              | 833,796.80                    | 21,134,400                     |
| <b>Goats</b>   | Irbid           | 132,685                | 11.20%            | 14,873.50                     | 663,425                        |
|                | Jerash          | 32,578                 | 2.80%             | 917.34                        | 162,890                        |
|                | Ajloun          | 26,523                 | 2.30%             | 611.54                        | 309,360                        |
|                | Mafraq          | 22,461                 | 1.90%             | 424.2                         | 112,305                        |
|                | Amman           | 21,345                 | 1.80%             | 384.21                        | 106,725                        |
|                | Ma'an           | 19,234                 | 1.60%             | 307.74                        | 96,170                         |
|                | Zarqa           | 16,892                 | 1.40%             | 239.47                        | 84,460                         |
|                | Balqa           | 15,567                 | 1.30%             | 201.97                        | 77,835                         |
|                | Karak           | 15,234                 | 1.30%             | 197.99                        | 77,055                         |
|                | Tafilah         | 14,987                 | 1.30%             | 194.83                        | 76,415                         |
|                | Aqaba           | 14,742                 | 1.30%             | 191.58                        | 76,030                         |
|                | Total           | 1,198,408              | 100%              | 125,709.11                    | 6,244,710                      |

Mafraq leads Jordan in sheep herds (37.4%) but ranks fourth in goat metrics. Sustainability depends on how Mafraq manages its sheep herds; large herds can be beneficial if managed properly, but detrimental if not.
